# Supplementary material for: Canine Epithelial Skin Tumours: Expression of the Stem Cell Markers Lgr5, Lgr6 and Sox9 in Light of New Cancer Stem Cell Theories
Source: MDPI journal article supplement (doi:10.3390/vetsci7020062), 2020-05-08
Supplement: s1 [file s1]

# Supplementary Materials

**Supplementary table 1.** RT-qPCR primers and probes.

| Candidate gene | Forward primer               | Reverse primer                 | Probe                             | Amplicon length | Reference sequence  |
|----------------|------------------------------|--------------------------------|-----------------------------------|-----------------|---------------------|
| <i>Sox9</i>    | TTCCGCGACGTGG<br>ACAT        | TCGAATTCGTTGACGT<br>CGAA       | AGCAGCGACGTCATCT<br>CCAACATAGAGAC | 77bp            | NM_00100<br>2978.1  |
| <i>Lgr5</i>    | GGCTCCACAGCCT<br>AGAGACTTTAG | TTGTTGCTGTGAAATC<br>CTAGTTCTTT | AATCTTGATGAATTCC<br>CCACCGCCA     | 109bp           | XM_846738<br>.2     |
| <i>Lgr6</i>    | CTGGGCAGACTGC<br>AGGAACT     | GCAGAGGGTTCCCCAT<br>GAAA       | AACAACATCAAGGCC<br>ATCCCAGAGAAGG  | 82bp            | XM_003562<br>2187.1 |

**Supplementary table 2.** Summary of the results obtained by IHC, RT-qPCR and histological analysis of the samples. .

|            | IHC    |       | RT-qPCR |       |                                             | Histological analysis (H&E staining) |                             |         |           |                    |                                        |
|------------|--------|-------|---------|-------|---------------------------------------------|--------------------------------------|-----------------------------|---------|-----------|--------------------|----------------------------------------|
|            | Sox9   | Sox9  | Lgr5    | Lgr6  | Differentiation                             | Invasion                             | Ulceration/<br>haemorrhages | Mitosis | Apoptosis | Necrosis           | Inflammation                           |
| <b>SCC</b> |        |       |         |       |                                             |                                      |                             |         |           |                    |                                        |
| 1          | 0      | 0.03  | 0.02    | 0.09  | WD                                          | Yes (focal)                          | no                          | 21/17   | +++       | yes                | 2-3; L, PC                             |
| 2          | 0      | 0.03  | 0.07    | 0.09  | WD, in situ                                 | No                                   | yes                         | 3/10    | +         | No                 | 2; N, due to ulceration                |
| 3          | 0      | 0.05  | 0.01    | 2.52  | MD/PD                                       | yes                                  | yes                         | 13/10   | +         | yes                | 2; N                                   |
| 4          | 0      | 0.06  | 0.02    | 0.36  | PD                                          | yes                                  | Yes                         | 16/10   | +++       | yes                | 2; N                                   |
| 5          | 0      | 0.14  | 0       | 0.69  | WD                                          | yes                                  | yes                         | 16/10   | +         | yes                | 2; L, PC                               |
| 6          | 25>-50 | 0.15  | 0.01    | 0.65  | PD                                          | yes                                  | yes                         | 28/10   | +++       | yes                | 3; N, L, PC                            |
| 7          | 10>-25 | 10.25 | 0.27    | 0.11  | PD/spindle cell                             | yes                                  | yes                         | 32/10   | +         | yes                | 4; N, L, PC                            |
| 8          | 10>-25 | 74.25 | 0       | 0     | PD                                          | yes                                  | yes                         | 18/10   | +++       | yes                | 3; N, L, PC                            |
| 9          | 10>-25 | 0.28  | 0.18    | 0.74  | WD                                          | Yes                                  | Yes                         | 12/10   | ++        | No                 | 1; L, PC, N                            |
| <b>BCC</b> |        |       |         |       |                                             |                                      |                             |         |           |                    |                                        |
| 1          | 10>-25 | 0.23  | 0       | 0.34  | Basosquamous                                | Yes                                  | Yes                         | 28/8    | -/+       | Yes                | 1; L, PC, N                            |
| 2          | 0      | 0.13  | 0.06    | 5.18  | Scattered foci of squamous differentiation  | Yes                                  | No                          | 26/10   | ++        | Yes                | 1; L, PC                               |
| 3          | 0      | 0.03  | 0       | 0.04  | Basal                                       | Yes                                  | Yes                         | 19/10   | ++        | Yes                | 1; L, PC, N                            |
| 4          | 0      | 0.14  | 0.01    | 0.53  | Scattered foci of squamous differentiation  | No                                   | No                          | 3/10    | +         | No                 | 1; L, PC                               |
| 5          | 25>-50 | 0.29  | 0.01    | 9.60  | Basal                                       | Yes                                  | Yes                         | 64/10   | -         | Yes                | 1; N                                   |
| 6          | >50    | 0.32  | 0.06    | 2.03  | Basal, some parts with vacuolated cytoplasm | Yes                                  | Yes                         | 26/10   |           | Yes<br>(+++center) | 2; L, PC, N                            |
| <b>TL</b>  |        |       |         |       |                                             |                                      |                             |         |           |                    |                                        |
| 1          | 0      | 0.68  | 5.14    | 2.91  | Bulb type                                   | No                                   | No                          | 4/10    | -/+       | No                 | 0; scattered L                         |
| 2          | 10>-25 | 1.65  | 1.98    | 25.55 | Bulb type                                   | No                                   | No                          | 10/10   | -/+       | No                 | 0                                      |
| 3          | 0>-10  | 0.53  | 0       | 0.01  | Bulb type                                   | Yes                                  | No                          | 3/10    | -/+       | No                 | 0; scattered L                         |
| <b>IKA</b> |        |       |         |       |                                             |                                      |                             |         |           |                    |                                        |
| 1          | 0      | 3     | 0       | 0.49  | WD, MALIGNANT                               | Yes                                  | Yes                         | 5/10    | +         | Yes                | 4; N, L, PC                            |
| 2          | 0      | 0.40  | 0.06    | 0.38  | WD, MALIGNANT                               | Yes                                  | Yes                         | 8/10    | ++        | Yes                | 4; N, L, PC                            |
| 3          | 10>-25 | 0.55  | 0.11    | 0.48  | WD                                          | No                                   | No                          | 5/10    | -/+       | No                 | 2; L, PC<br>(surrounding the neoplasm) |
| 4          | 10>-25 | 1.03  | 0.58    | 0.22  | WD                                          | No                                   | No                          | 5/10    | -/+       | No                 | No                                     |
| 5          | 25>-50 | 1.20  | 0.79    | 0.24  | WD                                          | No                                   | No                          | 5/10    | -/+       | No                 | No                                     |
| 6          | >50    | 1.09  | 4.98    | 3.84  | WD                                          | No                                   | No                          | 5/10    | -/+       | No                 | No                                     |
| 7          | 0>-10  | 1.37  | 7.22    | 4.42  | WD                                          | No                                   | No                          | 5/10    | -/+       | No                 | No                                     |
| 8          | 0>-10  | 2.32  | 2.04    | 0.63  | WD                                          | No                                   | No                          | 5/10    | -/+       | No                 | 2; L, PC (within the neoplasm)         |
| 9          | 10>-25 | 0.65  | 0.36    | 0.77  | WD                                          | No                                   | No                          | 5/10    | -/+       | No                 | 1; L, PC (within the neoplasm)         |
| <b>TB</b>  |        |       |         |       |                                             |                                      |                             |         |           |                    |                                        |
| 1          | 10>-25 | 0.89  | 8.99    | 20.52 | Ribbon type                                 | No                                   | Yes                         | 112/10  | -/+       | No                 | 2; N                                   |
| 2          | 25>-50 | 0.81  | 1.72    | 6.6   | Ribbon type                                 | No                                   | No                          | 33/11   | +         | No                 | No                                     |
| 3          | 25>50  | 3.60  | 1.37    | 66.04 | Ribbon type                                 | No                                   | No                          | 20/10   | -/+       | No                 | No                                     |

|    |        |       |      |       |                                                                           |                               |                                   |                  |     |             |                                                     |
|----|--------|-------|------|-------|---------------------------------------------------------------------------|-------------------------------|-----------------------------------|------------------|-----|-------------|-----------------------------------------------------|
| 4  | 0      | 1.79  | 0.29 | 25.96 | With ORS diff                                                             | No                            | Yes                               | 16/10            | ++  | No          | No                                                  |
| 5  | 0      | 19.24 | 0.86 | 46.94 | Trabecular/papillar/spindle, with cavernous cyst                          | No                            | No                                | 21/11            | -   | No          | No                                                  |
| 6  | 10>-25 | 0.24  | 8.04 | 3.13  | With ORS diff, spindle                                                    | No                            | No                                | 21/10            | ++  | No          | No                                                  |
| 7  | 0      | 1.16  | 9.74 | 11.79 | Trabecular type                                                           | No                            | No                                | 23/8             | +   | No          | No                                                  |
| 8  | 0>-10  | 1.40  | 5.83 | 13.28 | Trabecular type. and papillary bodies?                                    | No                            | No                                | 62/10            | -   | No          | No                                                  |
| TE |        |       |      |       |                                                                           |                               |                                   |                  |     |             |                                                     |
| 1  | 0>-10  | 1.18  | 0.04 | 0.39  | Infundibular cyst, matrical cords and nests                               | No                            | No                                | 48/10 (matrical) | -/+ | No          | 2; L, mainly perivascular in the surrounding dermis |
| 2  | 0>-10  | 0.19  | 0.05 | 0.4   | Mainly matrical                                                           | No                            | No                                | 65/10            | -   | No          | No                                                  |
| 3  | 0      | 0.60  | 0.01 | 0.14  | Mainly Infundibular                                                       | No                            | No                                | 1/10             | -/+ | No          | No                                                  |
| 4  | 0      | 0.23  | 1.04 | 0.99  | Mainly matrical                                                           | No                            | No                                | 26/10            | -/+ | No          | 1; L, surrounding cystic structures                 |
| 5  | 0      | 0.22  | 0.88 | 0.61  | Mainly Infundibular/Basal cell                                            | No                            | yes                               | 115/10           | -   | No          | 1; L, PC                                            |
| 6  | 10>-25 | 0.21  | 0.88 | 2.94  | MALIGNANT TE Mainly matrical with intermediate diff                       | Yes                           | yes                               | 50/10            | +   | No          | 2; L, PC                                            |
| 7  | 25>-50 | 8.49  | 0.45 | 6.15  | MALIGNANT TE Mainly matrical with intermediate diff                       | Yes                           | No: ulceration; Yes: haemorrhages | 40/10            | +   | Yes         | 3; L, PC, associated with invasive nests            |
| 8  | 0      | 5.86  | 0.07 | 3.31  | MALIGNANT TE Basosquamous                                                 | Yes                           | Yes                               | 79/8             | ++  | Yes         | 3; L, PC                                            |
| 9  | 0      | 0.27  | 2.46 | 2.24  | MALIGNANT TE Mainly matrical with intermediate diff                       | Yes                           | Yes                               | 81/10            | ++  | Yes         | 3; L, PC, with associated pyogranuloma              |
| 10 | 0      | 0.27  | 0.25 | 0.07  | MALIGNANT TE Mainly matrical with foci of IRS diff.                       | No                            | No                                | 80/10            | -   | No          | 2; L (aggregates)                                   |
| 11 | 0      | 0.12  | 0.66 | 0.3   | MALIGNANT TE Mainly matrical with intermediate diff                       | Yes focal                     | Yes                               | 39/10            | -/+ | Yes         | 3; L, PC, with associated pyogranulomas             |
| PM |        |       |      |       |                                                                           |                               |                                   |                  |     |             |                                                     |
| 1  | 10>-25 | 0.14  | 0.20 | 1.69  | Multiple foci of squamous diff                                            | Yes                           | No                                | 77/10            | +   | Yes         | 2; Granulomatous                                    |
| 2  | 0>-10  | 0.49  | 3.23 | 1.98  | IRS* diff in one area of the wall (but trichoyaline granules not visible) | No fibrous tissue surrounding | No                                | 50/10            | -/+ | No          | 1; L, PC, mainly perivascular                       |
| 3  | 0>-10  | 0.20  | 1.62 | 4.25  | Multifocal IRS* diff within the wall. Rare squamous diff                  | No, dome shaped               | No                                | 51/10            | -/+ | No          | 2; L, PC                                            |
| 4  | 0>-10  | 0.18  | 0    | 0.20  | Multifocal IRS* diff within the wall.                                     | No                            | No                                | 89/10            | +++ | Yes central | 2; L, PC mainly surrounding the neoplasm            |
| 5  | 0      | 0.16  | 0    | 0.01  | Multifocal IRS* diff within the wall.                                     | No                            | No                                | 64/10            | ++  | Yes central | 2; L, PC mainly surrounding the neoplasm            |
| 6  | >50    | 0.34  | 0.49 | 0.70  | cystic                                                                    | No                            | No                                | 13/10            | +   | No          | 1-2; L, PC surrounding cystic structure             |

IHC: immunohistochemistry; H&E: hematoxylin and eosin staining. SCC: squamous cell carcinoma; BCC: basal cell carcinoma; IKA, infundibular keratinizing acanthoma; PM, pilomatricoma; TB, trichoblastoma; TE, trichoepithelioma; and TL, tricholemmoma. IRS: inner root sheath; ORS: outer root sheath. Diff.: differentiation. WD: well differentiated; MD: moderately differentiated; PD: poorly differentiated. Inflammatory cells: L: lymphocytes; PC: plasma cells; N: neutrophils. Grade of inflammation: 0: none/minimal; 1: mild; 2: moderate; 3: severe; 4: marked. Apoptosis score applied:

-: none; +/-: scattered, rare apoptotic cells (<5%); +: about 5%; ++: 6–10%; +++: more than 10% of apoptotic cells in a 20X field (evaluated in 10 20× fields). IHC results: for each sample, Sox9 positive cells were analyzed in 10 HPF (40×) and based on the protein expression levels 5 ranges were made: absent (0): no positive cells; low: >0%–<10% positive cells; moderate: ≥10%–<25% positive cells; high: ≥25%–<50% positive cells; very high: ≥50% positive cells. RT-qPCR results: Reactions were performed in triplicate and relative amount of cDNA was normalized to a reference gene. Fold changes were calculated based on expression in normal skin (n = 3).

**Supplementary file 1.** Immunofluorescence protocol.

Sections were deparaffinized and rehydrated by passage through xylene and graded ethanols. Antigen retrieval was carried out in either Sodium Citrate buffer (self made) pH 6.0 for 20 min at 80 °C or in TrisEDTA buffer (self made) pH 9.0 for 15 min in a pressure cooker. Non-specific background was blocked using 5% dried skim milk in PBS. Subsequently, primary anti-Lgr6 antibody were diluted in Dako REAL™ Antibody Diluent (S2022, Dako, Baar, Switzerland) and applied for 60 min at room temperature or overnight +4 °C. After primary antibody incubation, slides were incubated with Alexa fluor conjugated goat anti-rabbit secondary antibody (1:200) (SigmaAldrich, [St. Louis, MO, USA](#)) for 30 min at room temperature. After washing steps, slides were incubated for 2 min with DAPI solution (SigmaAldrich, [St. Louis, MO, USA](#)) at room temperature and then mounted and visualized in a fluorescence microscope. No immunofluorescence was detected in any of the experiments performed, neither in the tested samples nor in the included positive controls (human normal skin and canine trichoblastoma).
